# Supplementary material for: Efficacy and safety of transcutaneous auricular vagus nerve stimulation combined with conventional rehabilitation training in acute stroke patients: a randomized controlled trial conducted for 1 year involving 60 patients
Source: PubMed Central journal article supplement — Neural Regen Res. 2022 Jan 7;17(8):1809–13. doi: 10.4103/1673-5374.332155 (PMC8820701; doi:10.4103/1673-5374.332155), 2022-01-07
Supplement: NRR-17-1809_Suppl1.pdf [file NRR-17-1809_Suppl1.pdf]

## 重庆医科大学附属第二医院参加临床试验知情同意书

### 尊敬的患者：

您好！您将作为一名受试者，参加由重庆医科大学附属第二医院神经内科李长清教授主持的研究：耳迷走神经电刺激促进脑卒中患者神经功能恢复的临床研究。此项目由重庆市科卫联合医学科研项目资助进行。

本知情同意书提供给您一些信息以帮助您决定是否参加此项临床研究。您参加本研究是自愿的。为了确保本次试验顺利进行并充分保证您的权益，在您同意参加之前，您需要知道以下相关信息。

### 一. 临床试验的介绍

迷走神经电刺激分别对认知功能障碍及抑郁症的恢复有其独特的优势，美国 FDA 与欧洲各国已将癫痫，抑郁症批准为迷走神经电刺激的适应症并在临床获得不错的治疗效果。在研究中发现耳部迷走神经电刺激可明显改善脑缺血的受损神经功能。

### 二. 研究过程和方法：

研究纳入脑梗死病例 60 例，随机分为电刺激组（30 例）和常规治疗对照组（30 例），所有患者均接受常规的康复训练（偏瘫肢体综合训练，等速肌力训练等）及相应药物治疗和迷走神经电刺激，对照组的设备输出治疗量为 0。

如果您同意参与这项研究，我们将会对您进行编号，并根据对应编号按随机原则将您分入相应亚组，但您自己并不知道自己分组情况。

### 三. 研究可能的受益：

通过对您参与的治疗将有助于临床证实耳迷走神经电刺激对脑梗死治疗的安全性及有效性，但该研究对参与个体并没有直接的经济收益。

### 四. 研究风险与不适：

迷走神经电刺激已经进入临床 10 多年，耳部迷走神经电刺激因无需手术已替代第一代迷走神经电刺激仪进入临床应用，更加安全。进展性神经系统或其他严重器质性疾病患者；心律失常、哮喘或活动性肺疾患、消化性溃疡是其禁忌症。如患者在研究过程中出现一过性不良反应，不论是否与该项目有关，均应密切观察并处理；如出现严重不良反应，不论是否与该项目有关，均立即终止试验，作为脱落病例，如发现不良反应与研究项目本身密切相关，对参与者有严重威胁，均应立即终止该临床试验。常见的不良反应包括治疗局部皮肤发红、治疗部位短暂疼痛不适、头晕、腹部不适等，严重并发症包括：哮喘，心律失常等。

### 五. 自愿参与与退出

作为受试者，您可随时了解与本研究有关的信息资料和研究进展，自愿决定（继续）参加还是不（继续）参加。参加后，无论是否发生伤害，或是否严重，您可以选择在任何时候通知研究者要求退出研究，您的数据将不纳入研究结果，您的任何医疗待遇与权益不会因此而受到影响。如果继续参加研究，会对您造成严重的伤害，研究者也将会中止研究的进行。

但在参加研究期间，请您提供有关自身病史和当前身体状况的真实情况；告诉研究医生自己在本次研究期间所出现的任何不适；不得服用受限制的药物、食物等；告诉研究医生自己在最近是否曾参与其他研究，或目前正参与其他研究。如果因为您没有遵守研究计划，或者发生了与研究相关的损伤或者有任何其它原因，研究医师可以终止您继续参与本项研究。

#### 六. 隐私问题：

如果您决定参加本项研究，您参加试验及在试验中的个人资料均属保密。可以识别您身份的信息将不会透露给研究小组以外的成员，除非获得您的许可。您的档案将保存在重庆医科大学附属第二医院神经内科的科研档案柜中，仅供研究人员查阅。为确保研究按照规定进行，必要时，政府管理部门或伦理审查委员会的成员按规定可以在研究单位查阅您的个人资料。

这项研究结果发表时，也需要对保密方面进行承诺。

#### 七. 费用和补偿：

参与本研究并没有额外的经济补偿；如果您因参与这项研究而受到伤害，并证实确实是与该项临床研究相关的损害时，您可以获得免费治疗和 / 或相应的补偿。治疗费用由重庆医科大学附属第二医院提供。

#### 八. 联系方式：

如果您有与本研究有关的问题，或您在研究过程中发生了任何不适与损伤，或有关于本项研究参加者权益方面的问题，您可以与研究者牛陵川联系，电话**17723291108**。

#### 知情同意签字：

我已经阅读了本知情同意书，并且我的研究者\_\_\_\_\_（签字）已经将此次临床试验的目的、内容、风险和受益情况向我作了详细的解释说明，对我询问的所有问题也给予了解答，我对此项临床研究已经了解，我自愿参加本项研究。

受试者签名：\_\_\_\_\_

日期：\_\_\_\_年\_\_\_\_月\_\_\_\_日

（注：如果受试者不识字时尚需见证人签名，如果受试者无行为能力时则需代理人同意）
