# Supplementary material for: Efficacy and safety of transcutaneous auricular vagus nerve stimulation combined with conventional rehabilitation training in acute stroke patients: a randomized controlled trial conducted for 1 year involving 60 patients
Source: PubMed Central journal article supplement — Neural Regen Res. 2022 Jan 7;17(8):1809–13. doi: 10.4103/1673-5374.332155 (PMC8820701; doi:10.4103/1673-5374.332155), 2022-01-07
Supplement: NRR-17-1809_Suppl2.pdf [file NRR-17-1809_Suppl2.pdf]

# 重庆医科大学附属第二医院 伦理委员会

## 科研项目伦理预审意见书

主要研究者姓名：李长清

审查项目名称：耳迷走神经电刺激促进脑卒中患者神经功能恢复的临床研究

申报课题来源：重庆市卫生和计划生育委员会

所在科室：神内科

审查方式：快速审查 版本号：1.0

提交日期：2018年4月28日

---

经伦理委员会审查，项目所提交的研究方案等资料符合医学伦理原则和赫尔辛基宣言的各项要求，研究设计符合相关法律、法规。同意该项目的研究方案设计，同意该项目经我院申报。

重庆医科大学附属第二医院

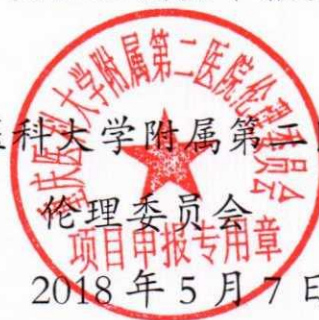

2018年5月7日
